# Supplementary material
Source: publisher figshare collection journal article supplement (https://acs.figshare.com/ndownloader/files/15849551)
Supplement: Supplementary file 1 [file 15849551]

## Supporting Information

### **Sensor I regulated ATPase activity of FleQ is essential for motility to biofilm transition in *Pseudomonas aeruginosa***

Priyajit Banerjee<sup>1, 3</sup>, Chanchal<sup>1, 2</sup> and Deepti Jain<sup>1\*</sup>

<sup>1</sup>Transcription Regulation Lab, Regional Centre for Biotechnology,  
NCR Biotech Science Cluster, 3<sup>rd</sup> Milestone, Faridabad-Gurgaon Expressway, Faridabad  
121001, India

<sup>2</sup>Manipal Academy of Higher Education, Karnataka, 576104, India

<sup>3</sup>Kalinga Institute of Industrial Technology, Bhubaneswar, Odisha 751024, India

# Figure S1

A

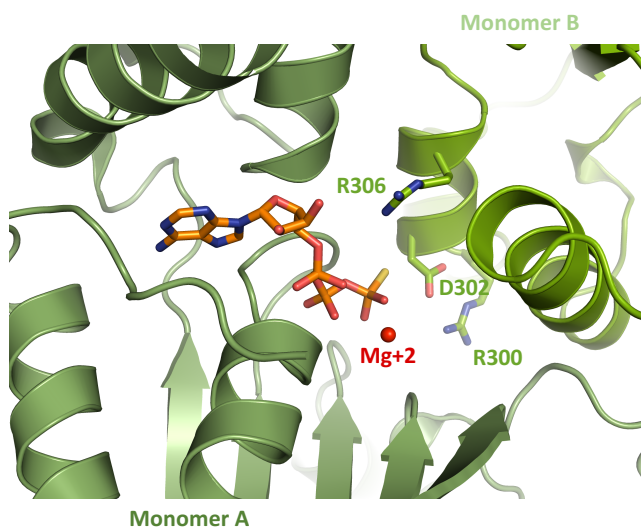

B

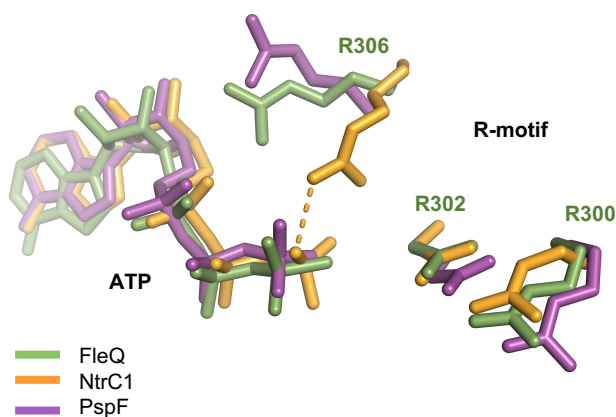

C

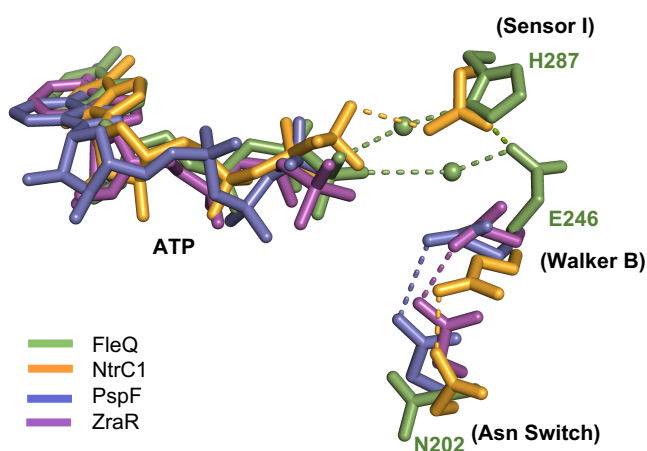

Figure: S1 (A) Inter protomeric interface of FleQ. One protomer depicted in smudge green and the other one in chartreuse. The putative R-motif (R300, D302 and R306) in trans is directed towards bound ATPyS (B) Structural superimposition of FleQ (green), NtrC1 (orange) and PspF (magenta) showing orientation and interactions of R motif (R finger) in FleQ, NtrC1 and PspF are represented. (C) Structural superimposition of FleQ (green), NtrC1 (orange) and PspF (magenta) and ZraR (blue) showing orientation and interactions of Glu switch and Asn switch.

# Figure S2

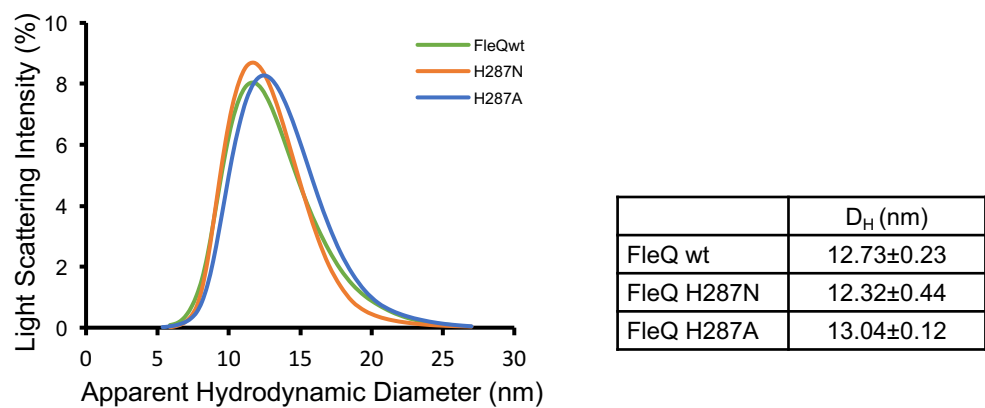

Figure: S2 The size distributions of apparent hydrodynamic diameters of wtFleQ (green), and sensor I mutants H287N (orange), H287A (blue) are shown. Obtained average hydrodynamic diameters with corresponding standard deviation are depicted in table.
